# Supplementary material for: S100A9+ MDSC and TAM-mediated EGFR-TKI resistance in lung adenocarcinoma: the role of RELB
Source: Oncotarget. 2018 Jan 10;9(7):7631–43. doi: 10.18632/oncotarget.24146 (PMC5800931; doi:10.18632/oncotarget.24146)
Supplement: Supplementary file 1 [file oncotarget-09-7631-s001.pdf]

# S100A9<sup>+</sup> MDSC and TAM-mediated EGFR-TKI resistance in lung adenocarcinoma: The role of *RELB*

## SUPPLEMENTARY MATERIALS

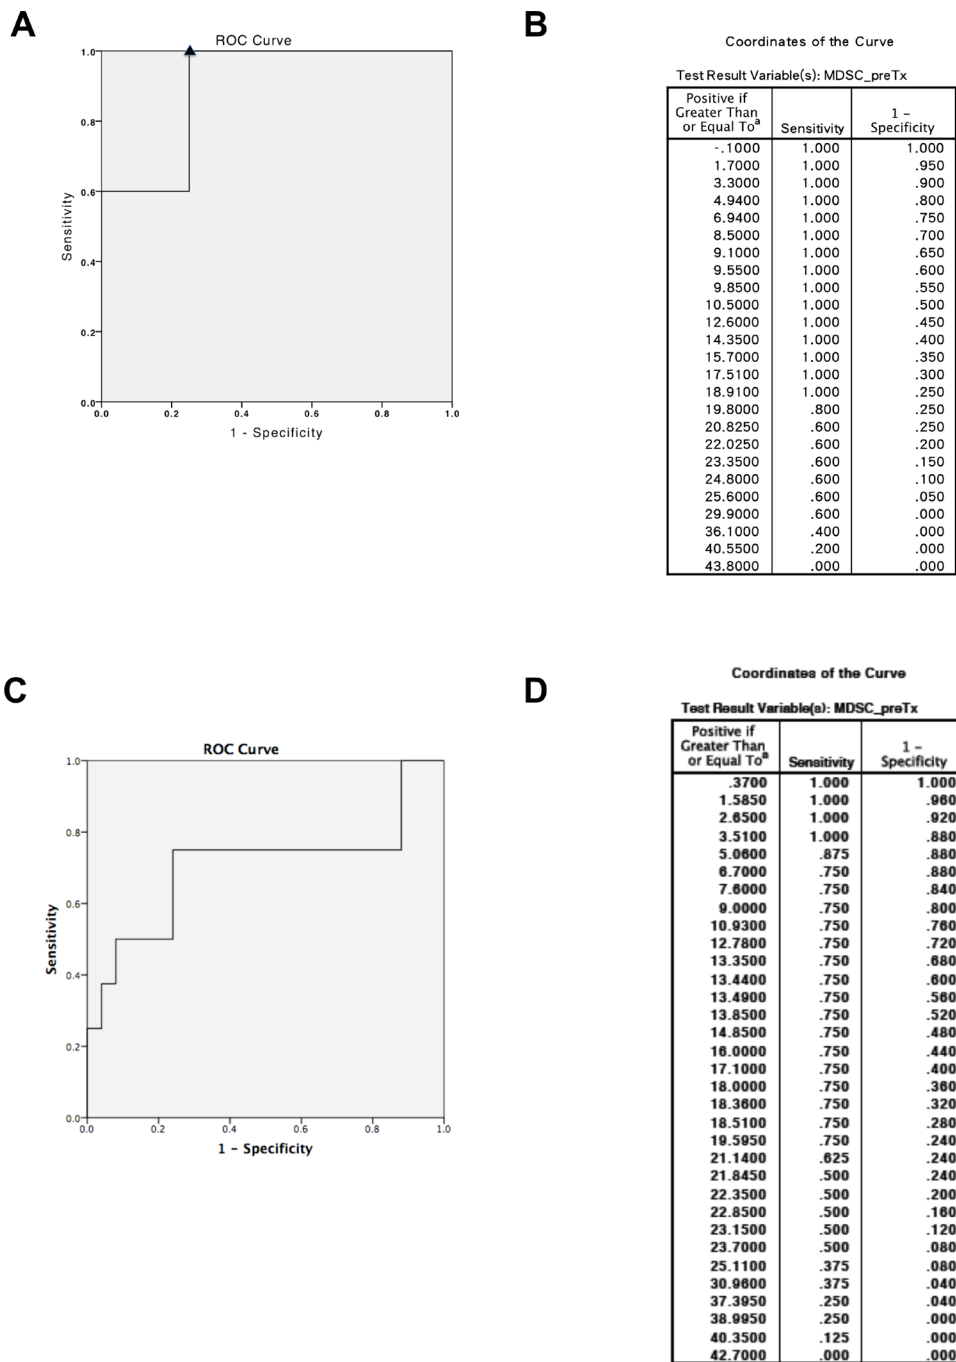

**Supplementary Figure 1:** (A and B) ROC curve and coordinates of the curve of training group. (C and D) ROC curve and coordinates of the curve of validation group.
